# Supplementary material for: Hydrogenation of 5-hydroxymethylfurfural in supercritical carbon dioxide–water: a tunable approach to dimethylfuran selectivity
Source: Royal Society of Chemistry journal article supplement (doi:10.1039/c3gc42145g), 2013-11-20

### Supporting information

## Hydrogenation of 5-hydroxymethylfurfural in supercritical carbon dioxide/water: A tunable approach to dimethylfuran selectivity

**Figure 1s:** Phase observation of DMF at various CO<sub>2</sub> pressures. at 80 °C and the fixed hydrogen pressure of 1 MPa: (a) initial, (b) 7 MPa, (c) 10 MPa and (d) 12 MPa and (e) 16 MPa

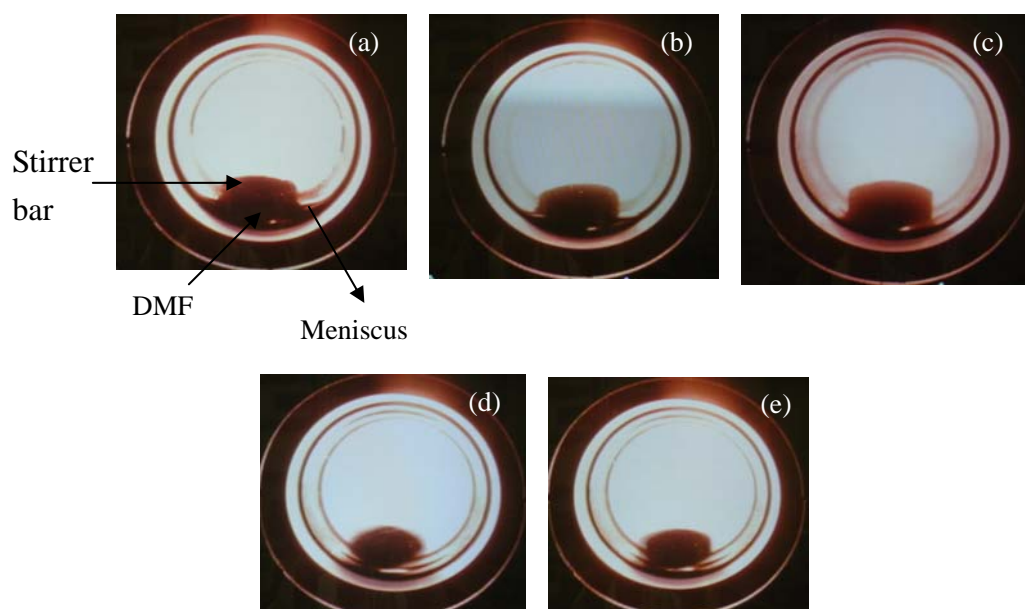

**Figure 2s:** Phase observation of aqueous solution of HMF in scCO<sub>2</sub> at 80 °C, P<sub>CO2</sub>= 10 MPa and the fixed hydrogen pressure of 1 MPa.

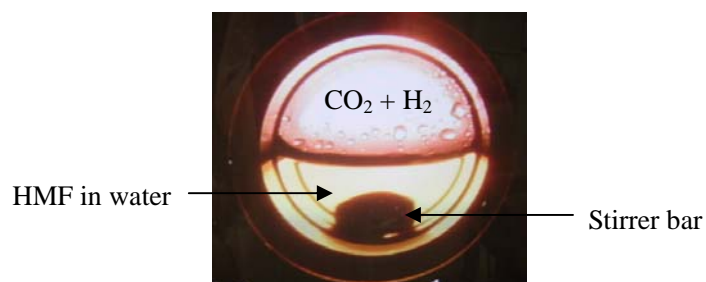

**Figure 3s:** TEM image of the catalyst (a) before reaction and (b) after 4<sup>th</sup> recycling

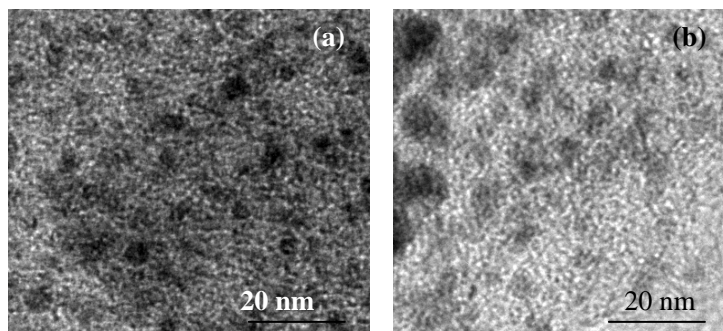

Table 1s: GCMS analysis of the reaction product obtained after 5 min. of reaction using 0.1 MPa of H<sub>2</sub>

| Time (min.) | P <sub>H2</sub> (MPa) | Conv. (%) | <b>1</b> (%) | <b>2</b> (%) | <b>3</b> (%) | <b>4</b> (%) |
|-------------|-----------------------|-----------|--------------|--------------|--------------|--------------|
| 5           | 0.1                   | 2.1       | 91.2         | 6.1          | 2.2          | 0.5          |

Reaction conditions: Catalyst: substrate= 1: 5; temperature= 80 °C, P<sub>CO2</sub>= 10 MPa, P<sub>H2</sub>= 0.1 MPa

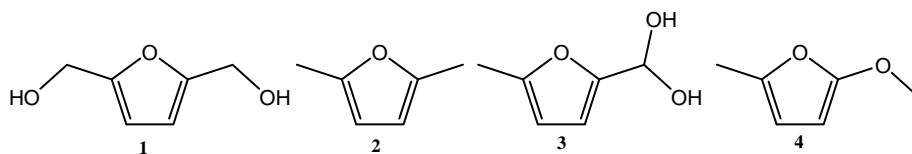

Supplement: c3gc42145g.pdf [file c3gc42145g.pdf]
